# Supplementary material
Source: ML conference proceedings conference paper supplement (https://openaccess.thecvf.com/content/CVPR2022/html/Kong_Efficient_Classification_of_CVPR_2022_paper.html)
Supplement: Supplementary file 2 [file Kong_Efficient_Classification_of_CVPR_2022_supplemental.zip]

Archive with 1 entries (1 files):
- 06580-supplemental.pdf
